# Supplementary material for: Factors Associated With Outpatient Visit Attendance After Discharge From Inpatient Psychiatric Units in a New York City Hospital
Source: Atypon-hosted journal article supplement (doi:10.1176/appi.ps.201600150), 2017-02-15
Supplement: appi.ps.201600150.ds001.pdf [file appi.ps.201600150.ds001.pdf]

**Table A1 Sample Characteristics (n=1,884)**

| <b>Variable</b>                                 | <b>N</b> | <b>%</b> |
|-------------------------------------------------|----------|----------|
| Attends initial appointment                     |          |          |
| Yes                                             | 1578     | 84       |
| No                                              | 306      | 16       |
| Unit                                            |          |          |
| Dual-diagnosis                                  | 533      | 28       |
| Latino                                          | 415      | 22       |
| General psychiatric                             | 936      | 50       |
| Case management                                 |          |          |
| Present                                         | 380      | 20       |
| Absent/Unknown <sup>1</sup>                     | 1504     | 80       |
| Gender                                          |          |          |
| Male                                            | 1336     | 71       |
| Female/Unknown <sup>2</sup>                     | 548      | 29       |
| Age, y: Continuous (M±SD)                       | 39±12    |          |
| Race/ethnicity                                  |          |          |
| White, non-Latino                               | 481      | 26       |
| Latino, preferred language Spanish              | 178      | 9        |
| Latino, preferred language English <sup>3</sup> | 376      | 20       |
| Black, non-Latino                               | 761      | 40       |
| Asian, non-Latino                               | 22       | 1        |
| Other, non-Latino                               | 66       | 4        |
| Country of origin                               |          |          |
| Born in US                                      | 522      | 28       |
| Born outside US                                 | 348      | 18       |
| Unknown                                         | 1014     | 54       |
| Immigration status                              |          |          |
| Documented                                      | 1672     | 89       |
| Undocumented                                    | 18       | 1        |
| Unknown                                         | 194      | 10       |
| Insurance                                       |          |          |
| Public: e.g. Medicaid, Medicare                 | 910      | 48       |
| Other                                           | 182      | 10       |
| Unknown/uninsured <sup>4</sup>                  | 792      | 42       |
| Housing status                                  |          |          |
| Domiciled                                       | 988      | 52       |
| Sheltered                                       | 223      | 12       |
| Homeless                                        | 508      | 27       |
| Unknown                                         | 165      | 9        |
| Medical comorbidity                             |          |          |
| Present                                         | 1084     | 58       |
| Absent                                          | 736      | 39       |

|                                                                                  |      |       |
|----------------------------------------------------------------------------------|------|-------|
| Unknown                                                                          | 64   | 3     |
| Primary diagnosis                                                                |      |       |
| Psychotic Disorders                                                              | 746  | 40    |
| Mood/anxiety Disorders                                                           | 633  | 34    |
| Major Depressive Disorder with<br>Psychotic Features/Schizoaffective<br>Disorder | 287  | 15    |
| Adjustment Disorders                                                             | 40   | 2     |
| Substance Abuse Disorders                                                        | 144  | 8     |
| Other/None                                                                       | 34   | 2     |
| Substance abuse present, not<br>primary diagnosis                                | 1276 | 68    |
| Length of stay in days: Continuous<br>(M±SD)                                     |      | 24±22 |

Categories may not sum to 100% due to rounding.

<sup>1</sup>Three patients with unknown case management were combined with no case management, to examine receipt of case management versus all else.

<sup>2</sup>One patient with unknown gender was included in female category to avoid missing data on this variable.

<sup>3</sup>Three patients had other preferred language, and were included with the English category.

<sup>4</sup>Uninsured could not be distinguished from unknown insurance status.

**Table A2 Utilization of Dual-Diagnosis Unit**

|                                       | <b>Attending Dual-Dx Unit</b> |     |       |
|---------------------------------------|-------------------------------|-----|-------|
|                                       | No                            | Yes | Total |
| Primary Axis I Diagnosis              |                               |     |       |
| Substance Abuse                       |                               |     |       |
| No                                    | 1,292                         | 448 | 1,740 |
| Yes                                   | 59                            | 85  | 144   |
| Total                                 | 1,351                         | 533 | 1,884 |
| <br>                                  |                               |     |       |
| Substance use – not primary diagnosis |                               |     |       |
| No                                    | 504                           | 104 | 608   |
| Yes                                   | 847                           | 429 | 1,276 |
| Total                                 | 1,351                         | 533 | 1,884 |

**Table A3 Utilization of Latino Unit**

|                             | <b>Attending Latino Unit</b> |     |       |
|-----------------------------|------------------------------|-----|-------|
| Latino – preferred language | No                           | Yes | Total |
| Spanish                     |                              |     |       |
| No                          | 1,436                        | 270 | 1,706 |
| Yes                         | 33                           | 145 | 178   |
| Total                       | 1,469                        | 415 | 1,884 |
| Latino –preferred language  |                              |     |       |
| English                     |                              |     |       |
| No                          | 1,230                        | 278 | 1,508 |
| Yes                         | 239                          | 137 | 376   |
| Total                       | 1,469                        | 415 | 1,884 |

**Table A4 Attending Initial Appointment, by Unit**

| <b>Unit</b>                    | <b>Attending Initial Appt</b> |    |
|--------------------------------|-------------------------------|----|
|                                | N                             | %  |
| Dual Diagnosis<br>Unit [N=533] | 465                           | 87 |
| Latino Unit<br>[N=415]         | 334                           | 80 |
| General Units<br>[N=936]       | 779                           | 83 |

## **Propensity Score Analysis**

Propensity score matching was conducted to examine whether the unit assignment was associated with probability of attending the initial outpatient appointment. This allows us to examine whether patients treated on different units had different rates of attending the initial outpatient appointment, independent of the observable factors that may have influenced selection onto the unit (1). The first step was to estimate the observed characteristics associated with being treated on the specialty unit. The second step was to use logistic regression to generate propensity scores (1). The balancing property was satisfied for the propensity scores. The third step was to use the propensity scores to examine the association between treatment in the specialty unit and the outcome (attending the initial appointment). This was done using stratification: data was divided into blocks based on the propensity score, to allow for comparisons within groups of individuals with similar propensity to be assigned to the specialty unit. These scores were then averaged for an overall effect.

1. Marcus SM, Siddique J, Ten Have TR, et al: Balancing Treatment Comparisons in Longitudinal Studies. *Psychiatric Annals* 38(12): 805-811, 2008

**Table A6. Probability of Attending the Initial Appointment among Persons in Specialty Units (Propensity Score Matching)**

| Independent Variable          | Propensity Score – Stratification Matching |               |       |
|-------------------------------|--------------------------------------------|---------------|-------|
|                               | Coef                                       | 95% CI        | N     |
| Attending dual-diagnosis unit | .056*                                      | .013 to .099  | 1,884 |
| Attending Latino unit         | -.054                                      | -.117 to .009 | 1,884 |

\*p<.05
