# Supplementary material for: Factors Associated With Outpatient Visit Attendance After Discharge From Inpatient Psychiatric Units in a New York City Hospital
Source: Atypon-hosted journal article supplement (doi:10.1176/appi.ps.201600150), 2017-02-15
Supplement: appi.ps.201600150.ds001.pdf [file appi.ps.201600150.ds001.pdf]

 


Psychiatry Online
